# Supplementary material
Source: PubMed Central journal article supplement (PMC3820950)
Supplement: supp_M112.024851_mcp.M112.024851-1.pdf [file supp_M112.024851_mcp.M112.024851-1.pdf]

## Supplementary Material

### *Molecular triangulation (MT) algorithm*

The modified MT method was applied to identify candidate genes associated with phenotype. The permutation-based p-values were combined across phenotypes for each gene and were used to rank genes in the network that included both seed and non-seed genes. The MT method adopts two different scores (*trn* and *cnt*) and two different background models (*ini* and *rwr*).

The first score was calculated as follows:  $S^{trn}(I, e; G = \langle N, E \rangle) = \sum_{v \in I} e(v) \frac{1}{1 + d_{uv}}$ , (1)

Where:  $G = \langle N, E \rangle$  = undirected molecular network

$N$  = set of genes and  $E$  is a set of their interactions

$I$  = set of seed genes

$e(v)$  = primary evidence i.e.  $-\log$  of p-value ( $< 5 \times 10^{-8}$ ) for all  $v \in I$ , these values provide confidence in the decision to include given gene as a seed node

$d_{uv}$  = length of the shortest path between genes  $u$  and  $v$  within network  $G$

The second score was measured by:  $S^{cnt}(T_i, I, e; G = \langle N, E \rangle)$  (2)

Where,

$T = \{T_1, \dots, T_M\}, T_i \subset N$  = predefined set of sets of the network genes

Second score is the number of edges in  $E$  that connect a node from  $T_i$  with a node from  $I$ . The method generates random initial sets  $I_j$  in *ini* background model or random networks  $E_j$  in the case of the *rwr* model. Later, method computes the score of the given initial set (real score) and its network and the background score for each of the background replicates for every test set  $T_i$ . We performed 1000 iterations by shuffling the edges to test for the significance of real

score. The smoothed p-value was calculated as explained by Iossifov *et al* (1). Shortest path length between the genes encoding proteins was calculated using the transcriptional, proteomic and metabolic interaction networks.

The first background model (*ini*) assumes that the set of initial nodes  $I$  is sampled uniformly from the network nodes in  $N$ . The second background model (*rwr*) assumes instead that the network edges  $E$  are attached to nodes using a random rewiring process so that every gene preserves its observed degree (2). Once a score function  $S$  and a background model are chosen, we can generate  $B$  replicates according to the background model ( $B$  random initial sets  $I^j$  in the case of the *ini* background model or  $B$  random networks  $E^j$  in the case of the *rwr* model). We compute the score for the given initial set and the given network

$s_i^{real} = S(T_i, I, e; G = \langle N, E \rangle)$  and the background score  $s_i^j$  for each of the background replicates ( $s_i^j = S(T_i, I^j, e; G = \langle N, E \rangle)$  for *ini* and  $s_i^j = S(T_i, I, e; G = \langle N, E^j \rangle)$  for *rwr*) for every test set  $T_i$ . We can then assign a  $p$ -value for each  $T_i$  based on how many of the background scores are higher or equal to the real score:

$$\hat{p}_i = \frac{|\{s_i^j : s_i^j \geq s_i^{real}\}|}{B}.$$

If all of the background scores are lower than the real score, the above definition will assign a  $p$ -value of 0 (1).

MT uses a null model in which the GWAS signals are uninformative (not linked to the phenotype) and any observed gene clustering within a molecular network is accidental. The hypothesis competing with the null assumes that the GWAS signal is associated with a group of genes within the molecular network.

**References:**

1. Iossifov, I., Rodriguez-Esteban, R., Mayzus, I., Millen, K. J., and Rzhetsky, A. (2009) Looking at cerebellar malformations through text-mined interactomes of mice and humans. *PLoS Comput Biol* 5, e1000559.
2. Feldman, I., Rzhetsky, A., and Vitkup, D. (2008) Network properties of genes harboring inherited disease mutations. *Proceedings of the National Academy of Sciences of the United States of America* 105, 4323-4328.

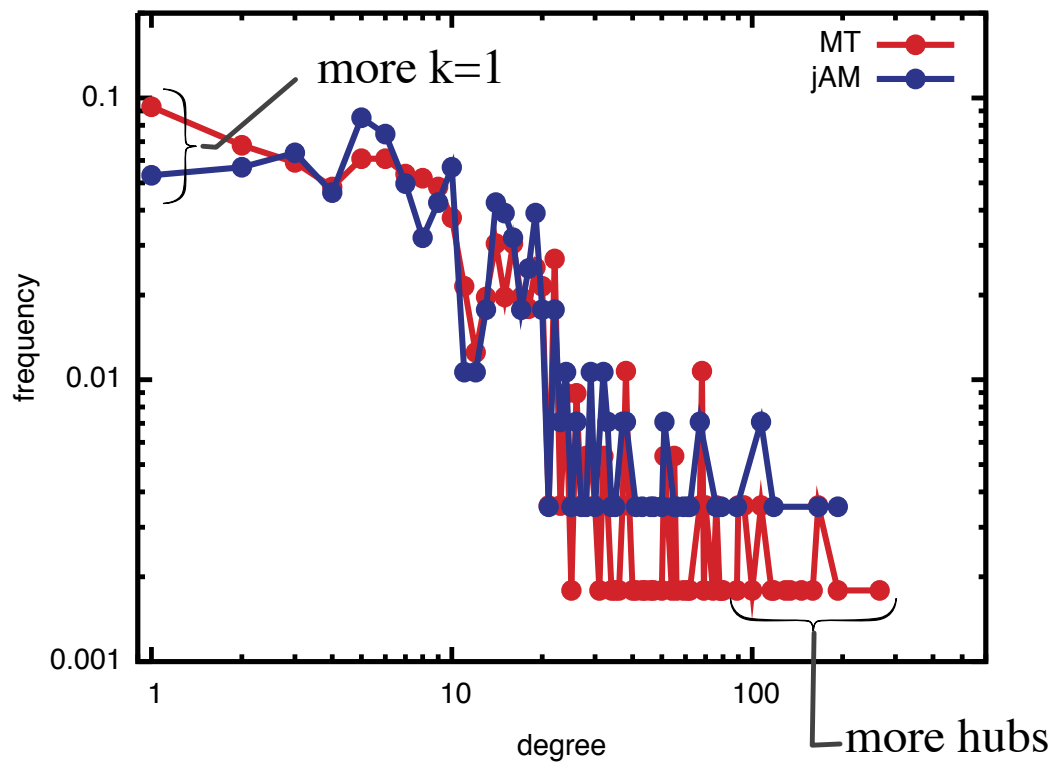

**Supplementary fig. S1:** Degree distributions of the genes unique to MT and jAM for the four traits.

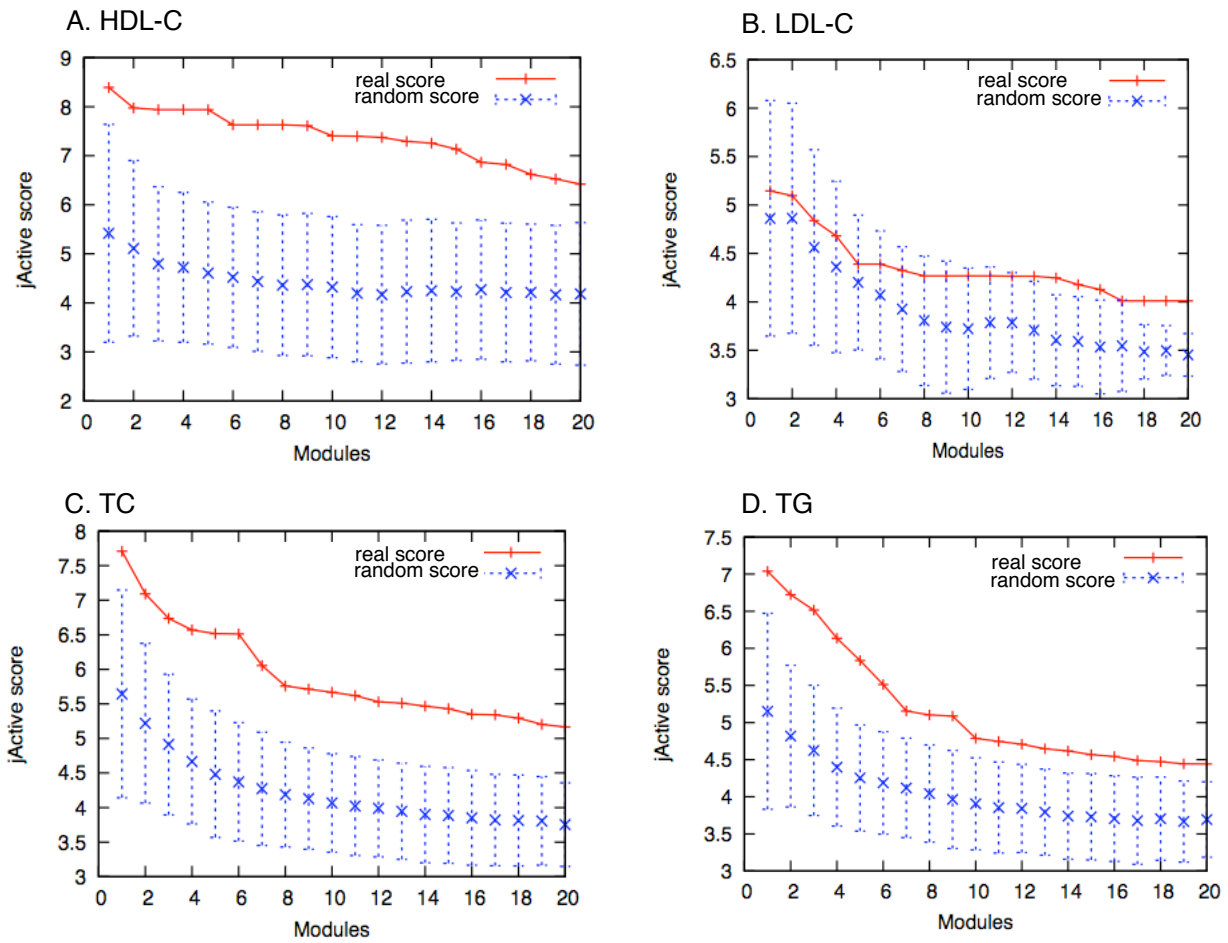

**Supplementary Fig. S2:** The average *jActive* scores and standard deviations obtained for HDL-C (A), LDL-C (B), TC (C) and TG (D) from top twenty modules and for 100 random genes. We identified modules for four traits by applying the criteria of nodes  $>3$  and  $<50$  having *jActive* score  $>3$ .

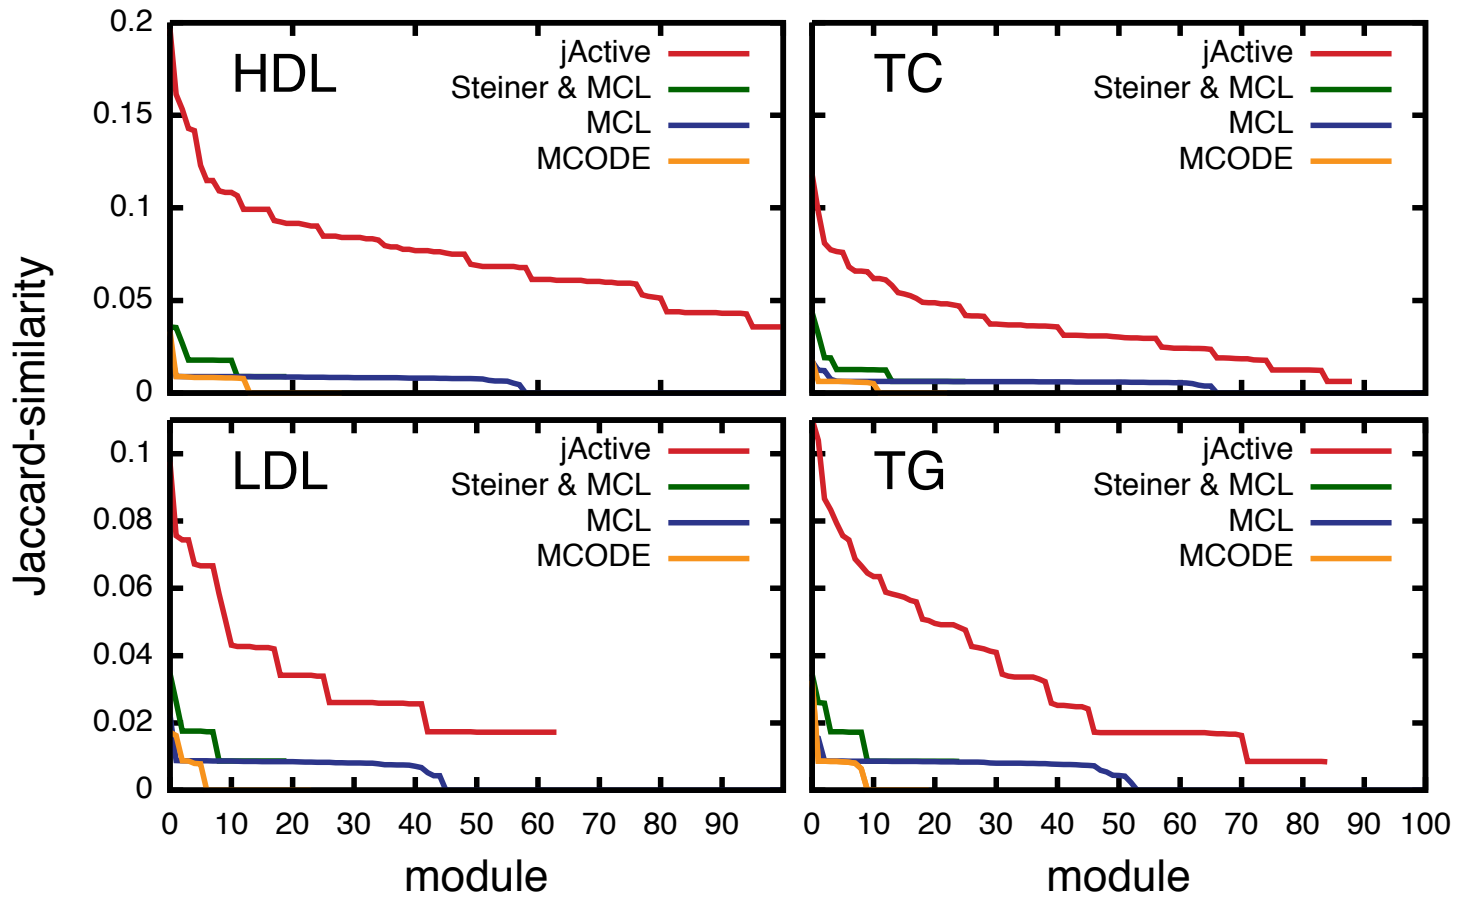

**Supplementary Fig.S3:** Comparison of *jActiveModule* with Steiner-MCL approach for seed genes coverage in interactome.

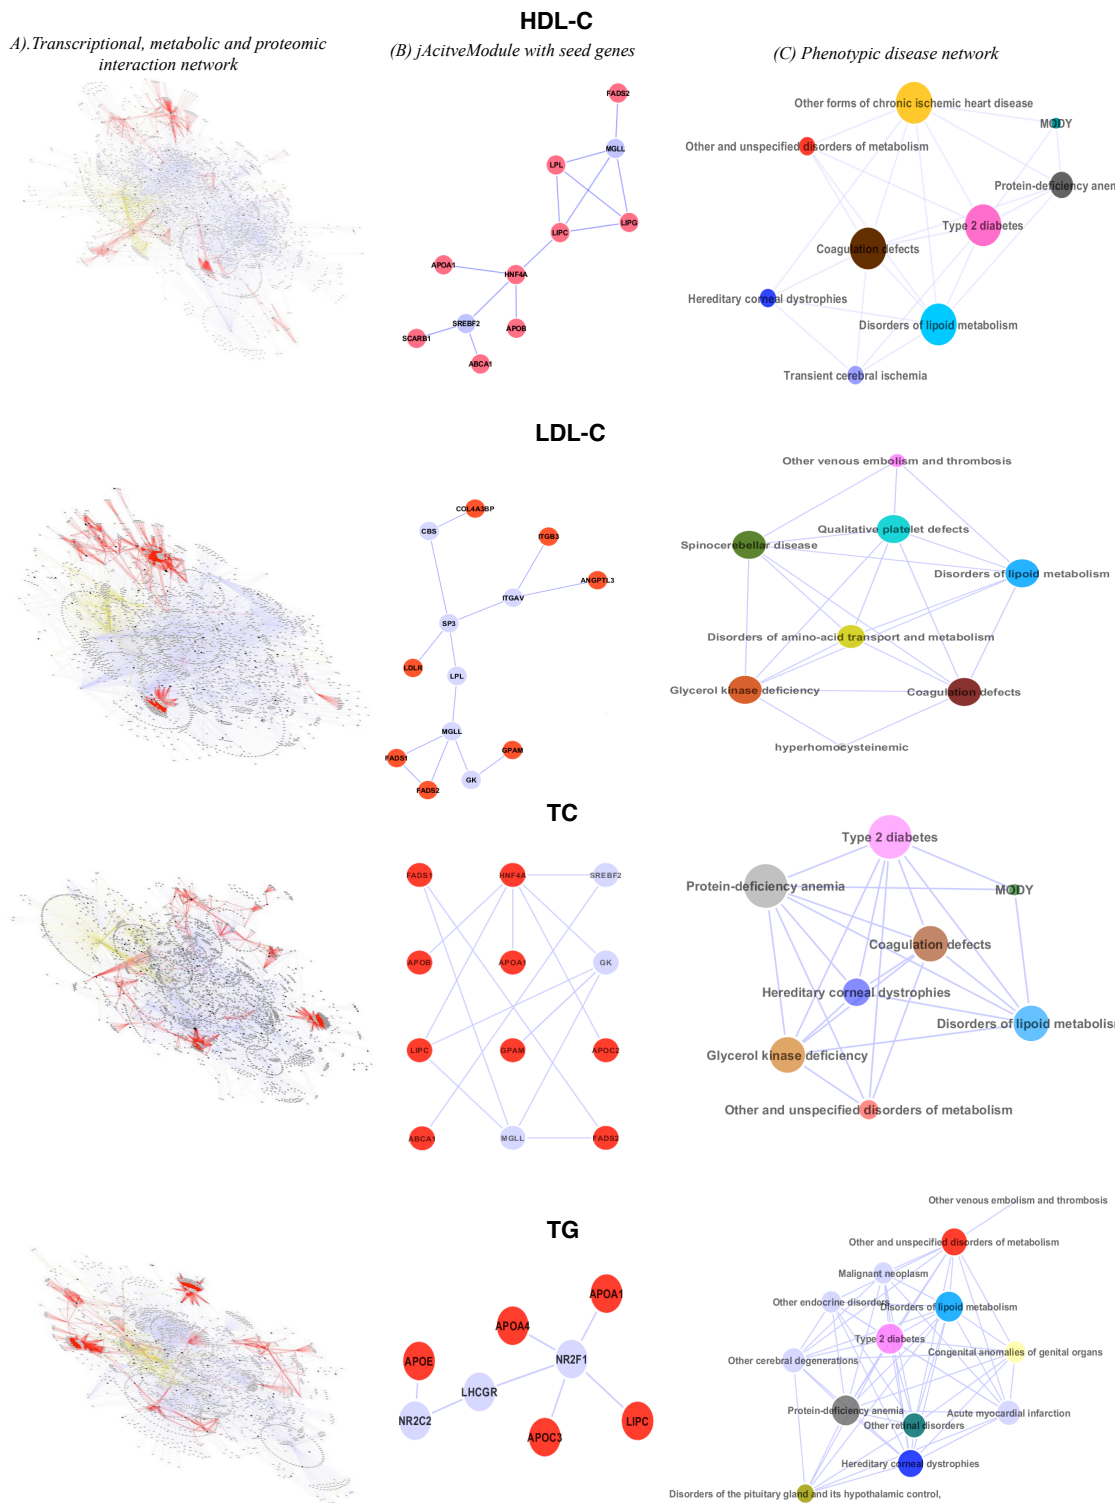

**Supplementary Fig.S4:** Depiction of comorbidity associations between diseases in a module. For each trait interactome (A), the unique ICD9 codes for genes in a module (B) were converted to construct a phenotypic disease network (C). Seed nodes are coloured as red in B. The sizes of the disease nodes in C are based on their connectivity with other diseases in a module.

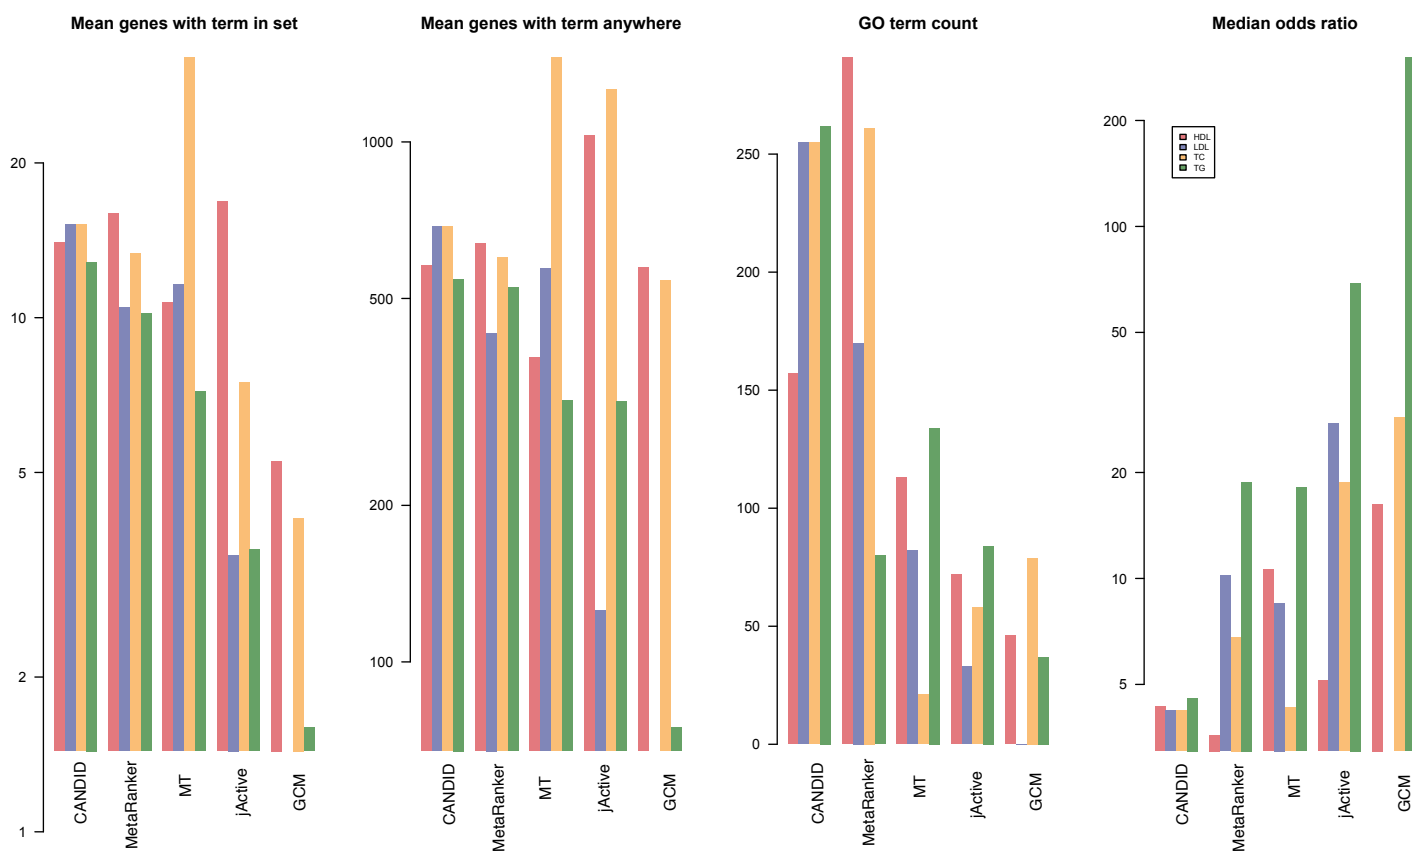

**Supplementary Fig.S5:** GO term enrichment tests of candidate genes prioritized by MT, *jActiveModule*, GCM, CANDID and MetaRanker.



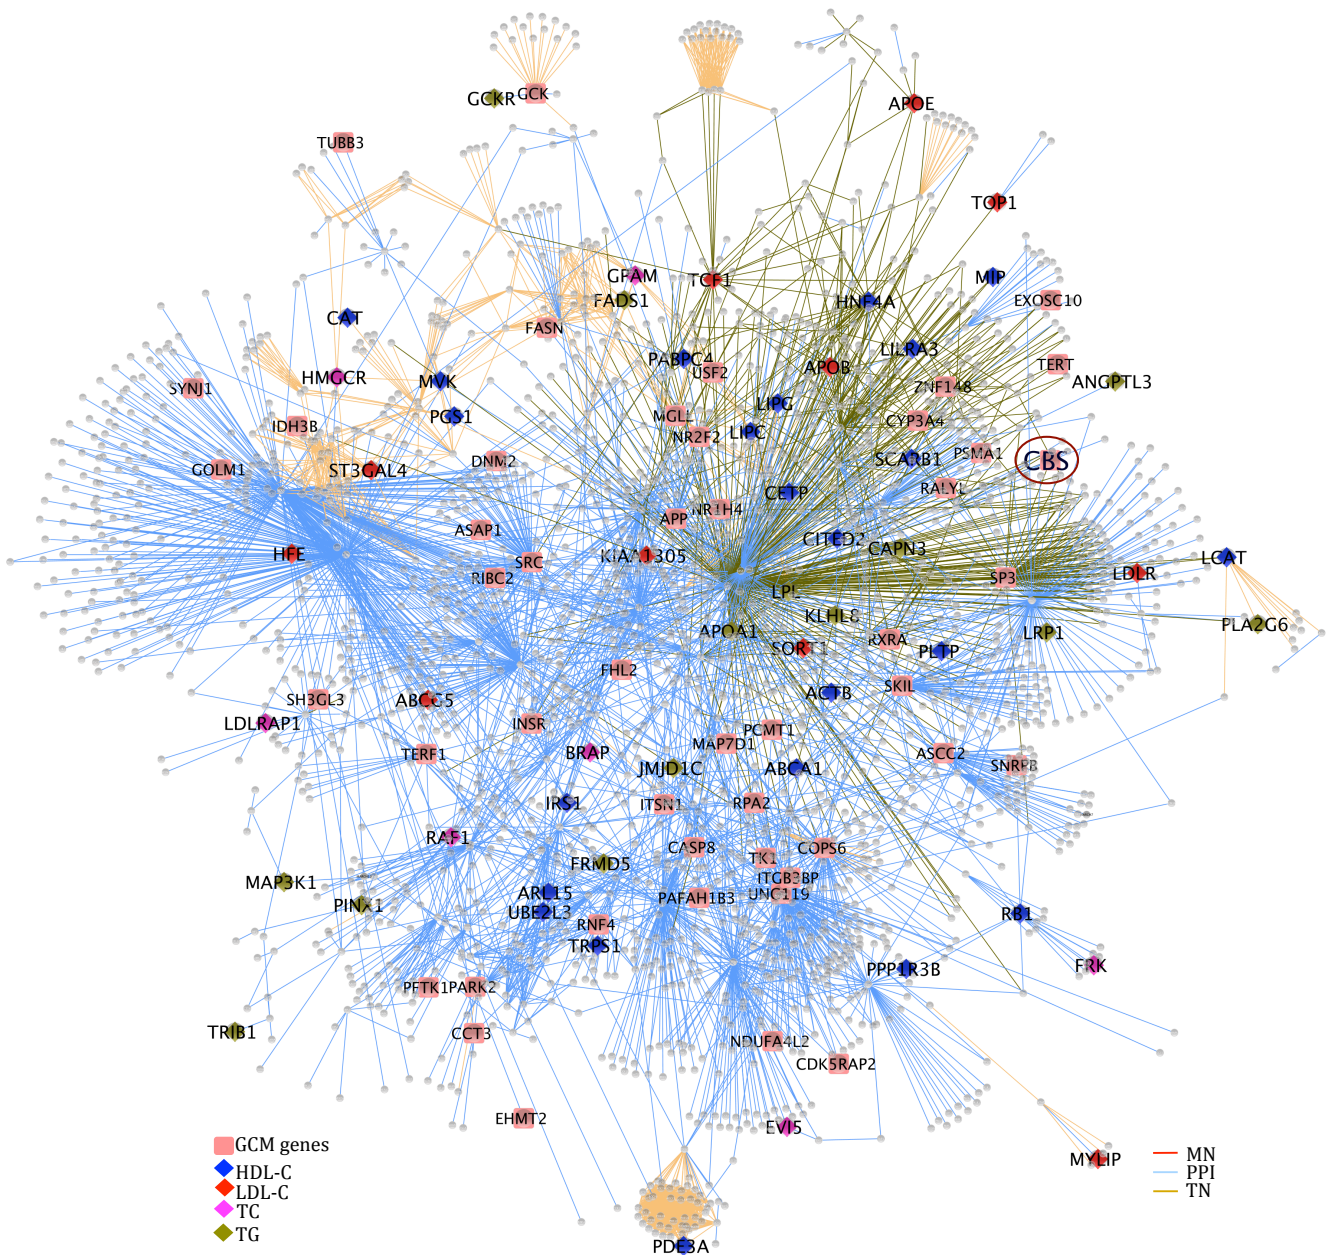

**Supplementary Fig.S6:** Seed and GCM genes for the four lipoprotein traits. GCM genes are rectangular and the seed genes are indicated as diamonds. The cystathionine beta-synthase gene (*CBS*) with a SNP that we found significantly associated in the MDC-CC cohort is circled in the interactome. All the metabolic interactions (MN) are indicated as orange lines, protein-protein interactions (PPI) as blue lines and transcription networks (TN) as yellow lines.

**Supplementary table S1:** Number of genes filtered in each step applied in our approach for selecting additional candidate genes for lipoprotein traits

| Trait | MT genes | MT-p-values | MT-jActive genes (jAM) | GCM genes | co-GCM genes | Co-GCM genes with p<0.05 in GLGC-GWAS |
|-------|----------|-------------|------------------------|-----------|--------------|---------------------------------------|
| HDL-C | 192      | 5.4E-5      | 107                    | 45        | 40           | 19                                    |
| LDL-C | 142      | 4.7E-5      | 42                     | 20        | 19           | 9                                     |
| TC    | 207      | 6.5E-5      | 84                     | 27        | 25           | 13                                    |
| TG    | 119      | 4.4E-5      | 45                     | 25        | 20           | 12                                    |

**Supplementary table S2:** Comparison of commonly predicted genes between CANDID, MetaRanker and the three steps in our approach (MT, *jActiveModule*, comorbidity analysis).

|                   | HDL- MT | p-value (Fischer' s test) | LDL-MT | p-value (Fischer' s test) | TC-MT | p-value (Fischer' s test) | TG-MT | p-value (Fischer' s test) |
|-------------------|---------|---------------------------|--------|---------------------------|-------|---------------------------|-------|---------------------------|
| <b>CANDID</b>     | 3.3%    | 0.022                     | 5.4%   | <0.0001                   | 7.5 % | <0.0001                   | 2.7%  | 0.29                      |
| <b>MetaRanker</b> | 2.7 %   | 0.099                     | 3.4%   | 0.016                     | 7.2%  | <0.0001                   | 4.5%  | 0.005                     |

  

|                   | HDL- jActive | p-value (Fischer' s test) | LDL-jActive | p-value (Fischer' s test) | TC-Jactive | p-value (Fischer' s test) | TG-jActive | p-value (Fischer' s test) |
|-------------------|--------------|---------------------------|-------------|---------------------------|------------|---------------------------|------------|---------------------------|
| <b>CANDID</b>     | 3.1%         | 0.22                      | 5.4%        | 0.1                       | 12.3 %     | <0.0001                   | 5.3%       | 0.1                       |
| <b>MetaRanker</b> | 4.2 %        | 0.03                      | 8.1%        | 0.001                     | 12.3%      | <0.0001                   | 10.5%      | <0.0001                   |

  

|                   | HDL- GCM | p-value (Fischer' s test) | LDL- GCM | p-value (Fischer' s test) | TC-GCM | p-value (Fischer' s test) | TG- GCM | p-value (Fischer' s test) |
|-------------------|----------|---------------------------|----------|---------------------------|--------|---------------------------|---------|---------------------------|
| <b>CANDID</b>     | 7%       | 0.0048                    | 5.3%     | 0.55                      | 15.6 % | <0.0001                   | 10%     | 0.0087                    |
| <b>MetaRanker</b> | 4.7 %    | 0.158                     | 10.5%    | 0.006                     | 15.6%  | <0.0001                   | 15%     | <0.0001                   |

  

|                  | HDL- CANDID | p-value (Fischer' s test) | LDL-CANDID | p-value (Fischer' s test) | TC-CANDID | p-value (Fischer' s test) | TG-CANDID | p-value (Fischer' s test) |
|------------------|-------------|---------------------------|------------|---------------------------|-----------|---------------------------|-----------|---------------------------|
| <b>MetRanker</b> | 4.5%        | <0.0001                   | 9%         | <0.0001                   | 6%        | <0.0001                   | 3%        | 0.004                     |

**Supplementary table S3:** Literature mining results for GCM genes. Gene order is based on descending p-values in GLGC GWAS data for the four traits. The table consist the description of candidate genes those found to be related to lipid metabolism.

| Gene   | Trait | Description                                                                                                                                                                                                                                                          | Reference                                                      |
|--------|-------|----------------------------------------------------------------------------------------------------------------------------------------------------------------------------------------------------------------------------------------------------------------------|----------------------------------------------------------------|
| APP    | HDL   |                                                                                                                                                                                                                                                                      |                                                                |
| RXRA   | HDL   | RXRA variants rs11185660 (P = 0.0021) has be reported to be associated with susceptibility to low HDL-C and CHD                                                                                                                                                      | Peloso et al. J Lipid Res.51:3524-32 ( 2010).                  |
| FASN   | HDL   | Found to be linked to visceral fat accumulation, impaired insulin sensitivity and increased lipetin and RBF4 suggesting its role in lipogenic pathway                                                                                                                | Diabetologia. 50, 1472-80 (2007)                               |
| INSR   | HDL   | n-3 fatty acids diets diminish arterial LDL-cholesterol deposition in mice with insulin resistance (Insr heterozygous knockout mice), and this is associated with changes in arterial LpL levels and distribution                                                    | Chang et al. Arterioscler Thromb Vasc Biol. 30:2510-7 (2010).  |
| CYP3A4 | HDL   | The CYP3A4 enzymes generate major oxysterols that enter the circulation. The oxysterols activate-via nuclear receptors-ATP-binding cassette (ABC) A1 and other genes, leading to the elimination of excess cholesterol and protecting arteries from atherosclerosis. | Luoma PV. Eur J Clin Pharmacol. 64:841-50 (2008).              |
| VASP   | HDL   | VASP phosphorylation flow cytometric assessment has been reported as a tool to evaluate the responsiveness to clopidogrel in coronary heart disease (CHD) patients                                                                                                   | Hezard et al. Platelets. 16;474-481 (2005)                     |
| SMURF2 | HDL   | Smurf2 as regulators of TGF-beta signaling; new targets for managing myofibroblast function and cardiac fibrosis.                                                                                                                                                    | Cunnington et al. Can. J. Physiol. Pharmacol. 87:764-772(2009) |
| PSMA1  | HDL   |                                                                                                                                                                                                                                                                      |                                                                |
| PCMT1  | HDL   |                                                                                                                                                                                                                                                                      |                                                                |
| DVL3   | HDL   | Dvl3 is required for cardiac outflow tract                                                                                                                                                                                                                           | Etheridge et al. PLoS Genet. 4:e1000259(2008 )                 |
| FHL2   | HDL   | Deletion of the FHL2 gene attenuates the formation of atherosclerotic lesions after a cholesterol-enriched diet.                                                                                                                                                     | Chu et al. Life Sci. 86:365-71 (2010).                         |

|          |     |                                                                                                                                                                                                                                                                                                                                           |                                                         |
|----------|-----|-------------------------------------------------------------------------------------------------------------------------------------------------------------------------------------------------------------------------------------------------------------------------------------------------------------------------------------------|---------------------------------------------------------|
| CASP8    | HDL |                                                                                                                                                                                                                                                                                                                                           |                                                         |
| ASCC2    | HDL |                                                                                                                                                                                                                                                                                                                                           |                                                         |
| TERT     | HDL | Telomerase reverse transcriptase promotes cardiac muscle cell proliferation                                                                                                                                                                                                                                                               | Oh et al. Proc Natl Acad Sci U S A. 98:10308-13 ( 2001) |
| RNF4     | HDL |                                                                                                                                                                                                                                                                                                                                           |                                                         |
| SKIL     | HDL |                                                                                                                                                                                                                                                                                                                                           |                                                         |
| RALYL    | HDL |                                                                                                                                                                                                                                                                                                                                           |                                                         |
| PFTK1    | HDL |                                                                                                                                                                                                                                                                                                                                           |                                                         |
| EHMT2    | HDL |                                                                                                                                                                                                                                                                                                                                           |                                                         |
| SH3GL2   | LDL | Intima-media thickness (IMT) of the carotid arteries, as measured by B-mode ultrasonography, is a quantitative trait that strongly predicts CVD and is increasingly used in clinical decision-making. A SNP- <b>rs2593404</b> near <b>SH3GL2</b> was found to be associated with IMT. But, this was not significant after the correction. | Lanktree et al. Stroke. 40:3173-9 (2009)                |
| SH3GL3   | LDL | A genome-wide linkage analysis to identify QTLs for plasma HDL-C levels in a well-characterized U.S. cohort consisting of multiplex families (GeneQuest). Fine mapping of the 15q25 QTL, we studied D15S983 and two SNPs, <b>rs1491579 (SH3GL3)</b> and rs1638634 adjacent to marker D15S655 with the highest LOD score.                  | Yang et al. J Lipid Res. 51:1442-51 ( 2010).            |
| UNC119   | LDL |                                                                                                                                                                                                                                                                                                                                           |                                                         |
| IDH3B    | LDL |                                                                                                                                                                                                                                                                                                                                           |                                                         |
| RPA2     | LDL |                                                                                                                                                                                                                                                                                                                                           |                                                         |
| CDK5RAP2 | LDL |                                                                                                                                                                                                                                                                                                                                           |                                                         |
| ITGB3BP  | LDL |                                                                                                                                                                                                                                                                                                                                           |                                                         |
| NDUFA4L2 | LDL |                                                                                                                                                                                                                                                                                                                                           |                                                         |
| SH3GL2   | TC  |                                                                                                                                                                                                                                                                                                                                           |                                                         |

|         |    |                                                                                                                                                     |                                                  |
|---------|----|-----------------------------------------------------------------------------------------------------------------------------------------------------|--------------------------------------------------|
| CBS     | TC | Hepatic steatosis in CBS(-/-) mice is caused by or associated with abnormal lipid metabolism                                                        | Namekata et al. J Biol Chem. 279:52961-9 (2004). |
| USP33   | TC |                                                                                                                                                     |                                                  |
| DCP2    | TC |                                                                                                                                                     |                                                  |
| EXOSC10 | TC |                                                                                                                                                     |                                                  |
| PSMA7   | TC |                                                                                                                                                     |                                                  |
| ZNF148  | TC | Nuclear proteins capable of binding to the MMP3 promoter is transcription factor ZBP89 (also named ZNF148) which acts as a transcriptional enhancer | Cardiovasc Res. 69,636-45 (2006)                 |
| SYNJ1   | TC |                                                                                                                                                     |                                                  |
| PARK2   | TC |                                                                                                                                                     |                                                  |
| SNRPB   | TC |                                                                                                                                                     |                                                  |

**Supplementary table S4:** Analysis of a combined associated effect of the four SNPs genotyped in MDC-CC cohort (Summing the number of risk alleles for each individual).

| <b>COMBINEDRISK_FOURSNP</b> |                |                                                         |                                                         |                                                         |                                                         |
|-----------------------------|----------------|---------------------------------------------------------|---------------------------------------------------------|---------------------------------------------------------|---------------------------------------------------------|
| <b>S_RISK_ALLELE COUNT:</b> |                | <b>Cholesterol</b>                                      | <b>Low density</b>                                      | <b>High density</b>                                     | <b>Triglycerides</b>                                    |
| <b>INSR.NDUFA4/2. CBS.</b>  |                | <b>(mmol/l)</b>                                         | <b>lipoprotein</b>                                      | <b>lipoprotein</b>                                      | <b>(mmol/l)</b>                                         |
| <b>DNM2</b>                 |                |                                                         | <b>(mmol/l)</b>                                         | <b>(mmol/l)</b>                                         |                                                         |
| 0                           | Mean           | 6.0889                                                  | 4.0537                                                  | 1.417                                                   | 1.3919                                                  |
|                             | N              | 305                                                     | 298                                                     | 304                                                     | 306                                                     |
|                             | Std. Deviation | 1.10461                                                 | 1.00802                                                 | 0.37605                                                 | 1.1281                                                  |
| 1                           | Mean           | 6.1709                                                  | 4.1605                                                  | 1.4029                                                  | 1.3182                                                  |
|                             | N              | 1106                                                    | 1081                                                    | 1094                                                    | 1108                                                    |
|                             | Std. Deviation | 1.16989                                                 | 1.01722                                                 | 0.39618                                                 | 0.73698                                                 |
| 2                           | Mean           | 6.17                                                    | 4.1702                                                  | 1.3668                                                  | 1.3952                                                  |
|                             | N              | 1559                                                    | 1518                                                    | 1540                                                    | 1556                                                    |
|                             | Std. Deviation | 1.07246                                                 | 0.96281                                                 | 0.36709                                                 | 0.77564                                                 |
| 3                           | Mean           | 6.1376                                                  | 4.1486                                                  | 1.392                                                   | 1.3274                                                  |
|                             | N              | 1163                                                    | 1141                                                    | 1155                                                    | 1164                                                    |
|                             | Std. Deviation | 1.04363                                                 | 0.96425                                                 | 0.37188                                                 | 0.76794                                                 |
| 4                           | Mean           | 6.2178                                                  | 4.2033                                                  | 1.3839                                                  | 1.4091                                                  |
|                             | N              | 466                                                     | 448                                                     | 456                                                     | 465                                                     |
|                             | Std. Deviation | 1.02687                                                 | 0.94645                                                 | 0.36046                                                 | 0.81499                                                 |
| 5                           | Mean           | 6.2491                                                  | 4.1964                                                  | 1.3264                                                  | 1.4713                                                  |
|                             | N              | 115                                                     | 111                                                     | 113                                                     | 115                                                     |
|                             | Std. Deviation | 1.23936                                                 | 1.05123                                                 | 0.34472                                                 | 0.78866                                                 |
| 6                           | Mean           | 6.6592                                                  | 4.65                                                    | 1.1817                                                  | 1.815                                                   |
|                             | N              | 12                                                      | 12                                                      | 12                                                      | 12                                                      |
|                             | Std. Deviation | 1.16357                                                 | 1.03089                                                 | 0.23417                                                 | 0.60157                                                 |
| Total                       | Mean           | 6.1649                                                  | 4.1601                                                  | 1.385                                                   | 1.3645                                                  |
|                             | N              | 4726                                                    | 4609                                                    | 4674                                                    | 4726                                                    |
|                             | Std. Deviation | 1.09147                                                 | 0.98013                                                 | 0.37483                                                 | 0.79738                                                 |
|                             |                | <b>P (linear regression adjusting for age and sex):</b> | <b>P (linear regression adjusting for age and sex):</b> | <b>P (linear regression adjusting for age and sex):</b> | <b>P (linear regression adjusting for age and sex):</b> |
|                             |                | <b>0.101</b>                                            | <b>0.057</b>                                            | <b>0.041</b>                                            | <b>0.026</b>                                            |
